# Supplementary material for: Acute Iron Deprivation Reprograms Human Macrophage Metabolism and Reduces Inflammation In Vivo
Source: PubMed Central journal article supplement (PMC6635384; doi:10.1016/j.celrep.2019.06.039), 2019-07-09
Supplement: mmc1.pdf [file mmc1.pdf]

Cell Reports, Volume 28

## Supplemental Information

**Acute Iron Deprivation Reprograms Human**

**Macrophage Metabolism and Reduces**

**Inflammation *In Vivo***

**Marie Pereira, Tai-Di Chen, Norzawani Buang, Antoni Olona, Jeong-Hun Ko, Maria Predecki, Ana S.H. Costa, Efterpi Nikitopoulou, Laura Tronci, Charles D. Pusey, H. Terence Cook, Stephen P. McAdoo, Christian Frezza, and Jacques Behmoaras**

A

Up-regulated

Down-regulated

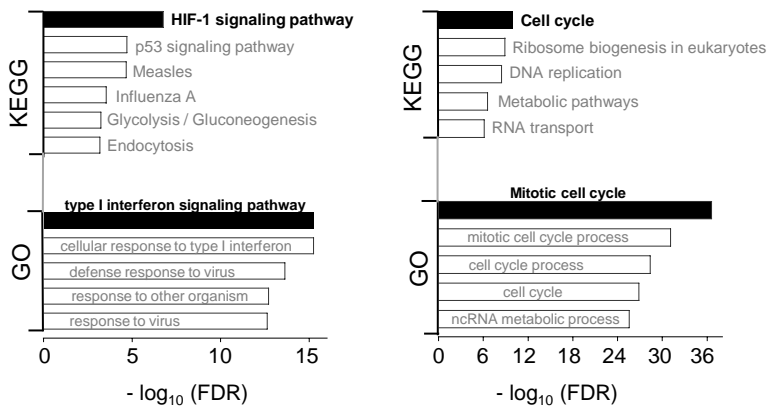

B

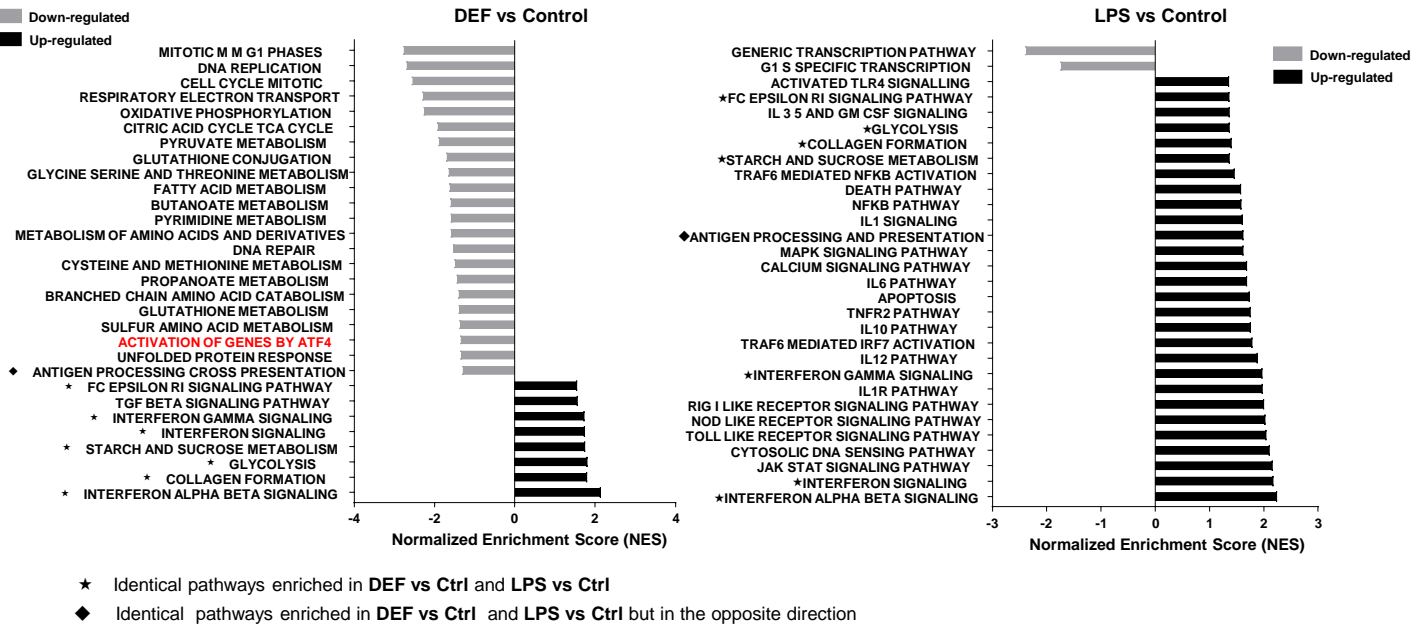

C

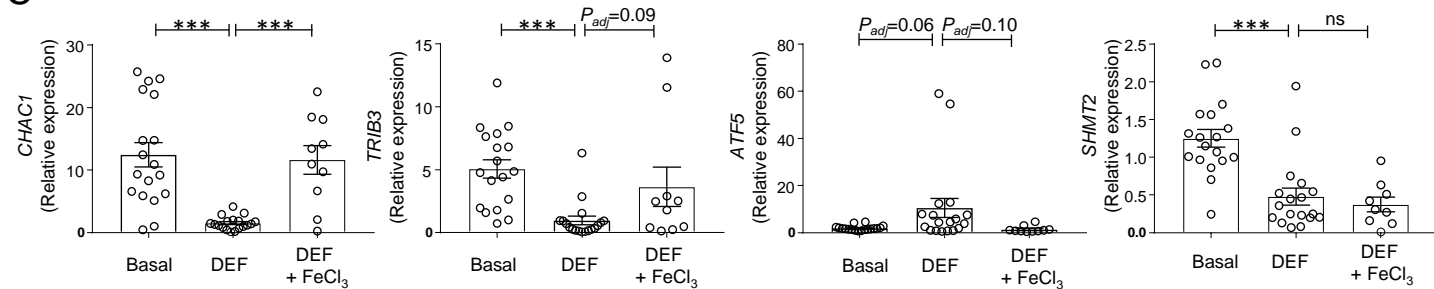

**Figure S1. Acute iron deprivation causes a distinct transcriptome and mediates an ATF4-dependent transcriptional response in human macrophages.** Related to Figure 1. (A) KEGG and Gene ontology (GO) analyses on differentially expressed genes (DEF vs Ctrl) in human macrophages. (B) Gene Set Enrichment Analysis (GSEA), on DEF (500 $\mu$ M, 24h) vs Ctrl and LPS (3h, 100ng/ml) vs Ctrl comparisons in human macrophages. ‘Activation of genes by ATF4’ pathway is shown in red. (C) ATF4 target gene expression in iron-deprived (DEF) and rescued (DEF+FeCl<sub>3</sub>) human macrophages. \*\*\*,  $P < 0.001$  by ANOVA followed by Tukey’s multiple comparisons test.  $P_{adj}$  denotes adjusted  $P$ -value. FDR, false discovery rate. Error bars represent SEM.

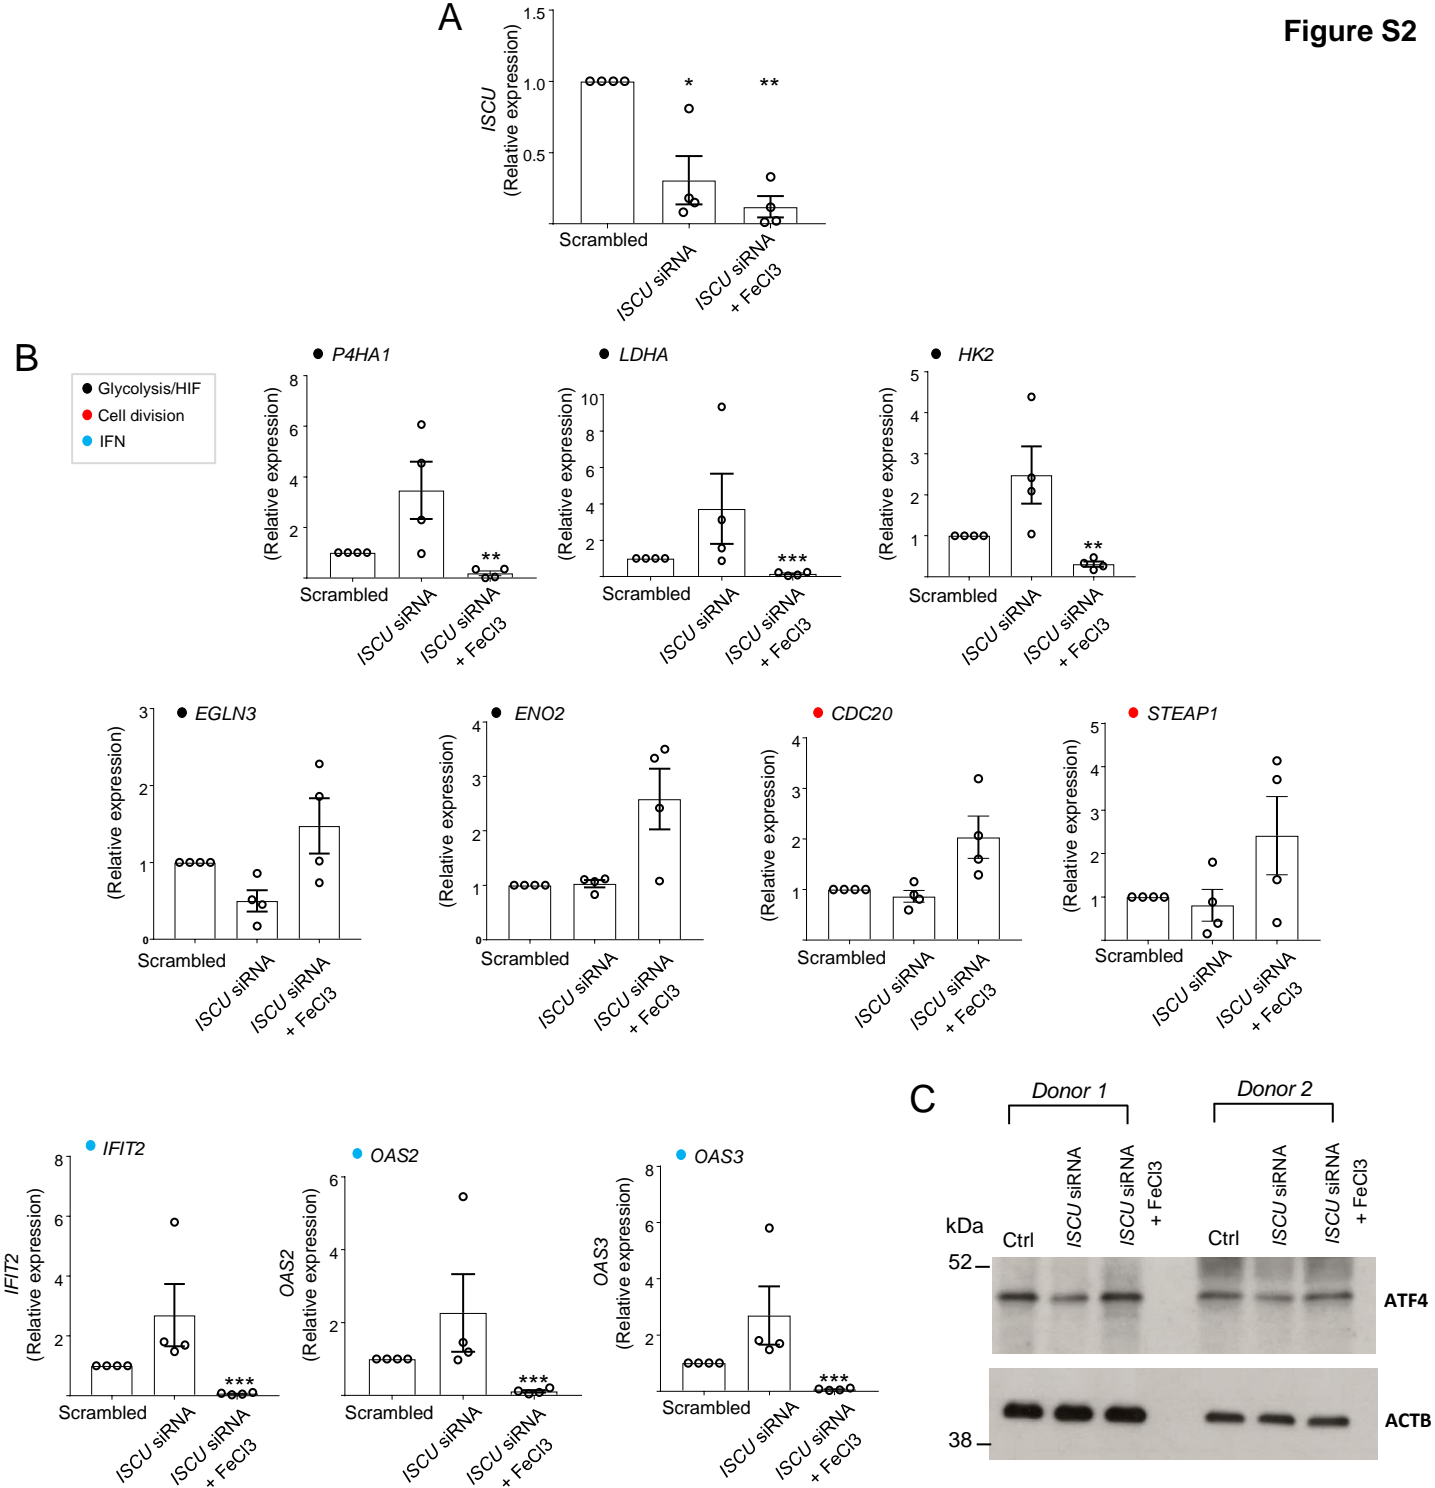

**Figure S2. *ISCU* mRNA knockdown causes similar transcriptional responses to the ones following deferiprone stimulation in human macrophages.** Related to Figure 1C and 1D. (A) *ISCU* expression by qRT-PCR. Human macrophages from 4 donors ( $n=4$ ) were either treated with *ISCU* or scrambled siRNA. Iron replenishment was obtained by adding 200  $\mu\text{M}$   $\text{FeCl}_3$  for 8 hours (*ISCU* siRNA +  $\text{FeCl}_3$ ) following *ISCU*-siRNA. (B) qRT-PCR for glycolysis/HIF, cell cycle/mitosis and IFN genes (colour-coded). (C) ATF4 Western Blotting in *ISCU* siRNA and *ISCU* siRNA followed by iron replenishment (*ISCU* siRNA +  $\text{FeCl}_3$ ) in 2 donors. \*,  $P<0.05$ ; \*\*,  $P<0.01$ , \*\*\*,  $P<0.001$  by one sample t-test compared to 100% (Scrambled). Error bars represent SEM.

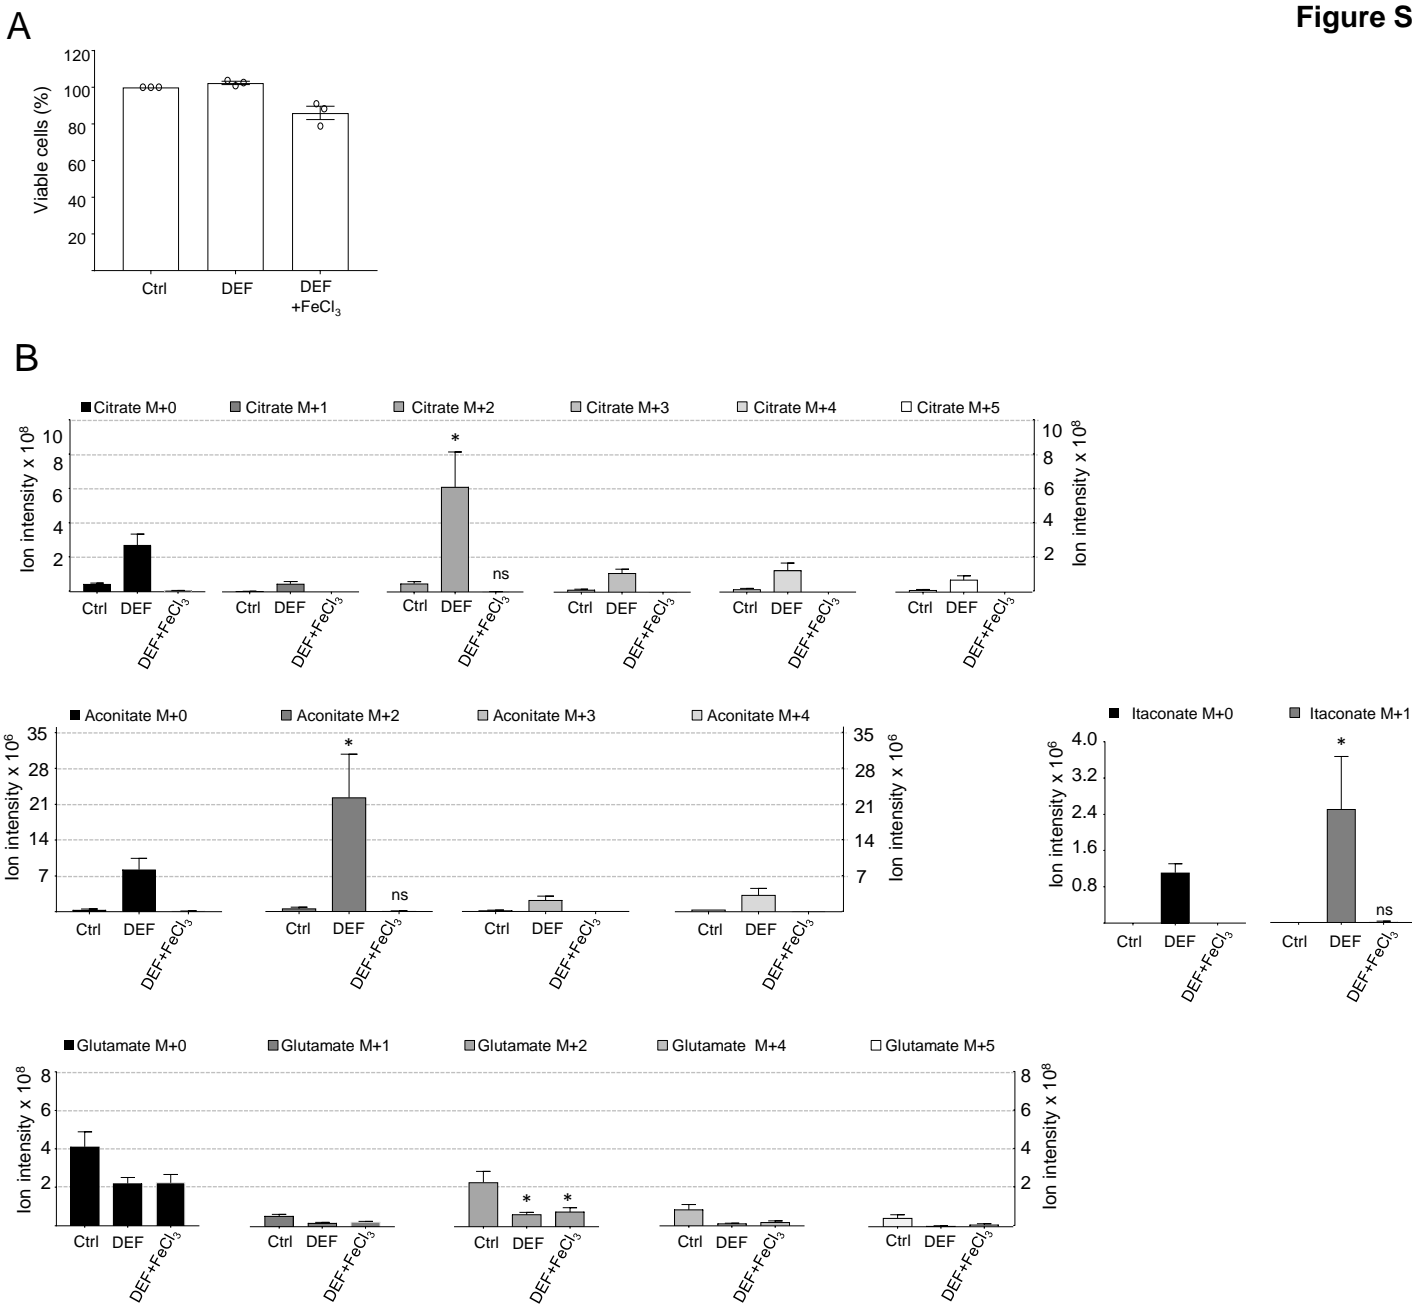

**Figure S3. Acute iron deprivation causes citrate, aconitate and itaconate accumulation while decreasing glutamate levels in human macrophages.** Related to Figure 3. (A) Cell viability measured by Alamar blue.  $n=3$  donors. (B) Isotopologue quantification by LC-MS for citrate, aconitate, itaconate and glutamate.  $n=6$  donors. \*,  $P<0.05$ , when compared to control by ANOVA followed by Dunnett's multiple comparisons test. For simplicity, only glucose-derived isotopologues were compared for significance (M+2 citrate, glutamate, aconitate and M+1 itaconate). Error bars represent SEM.

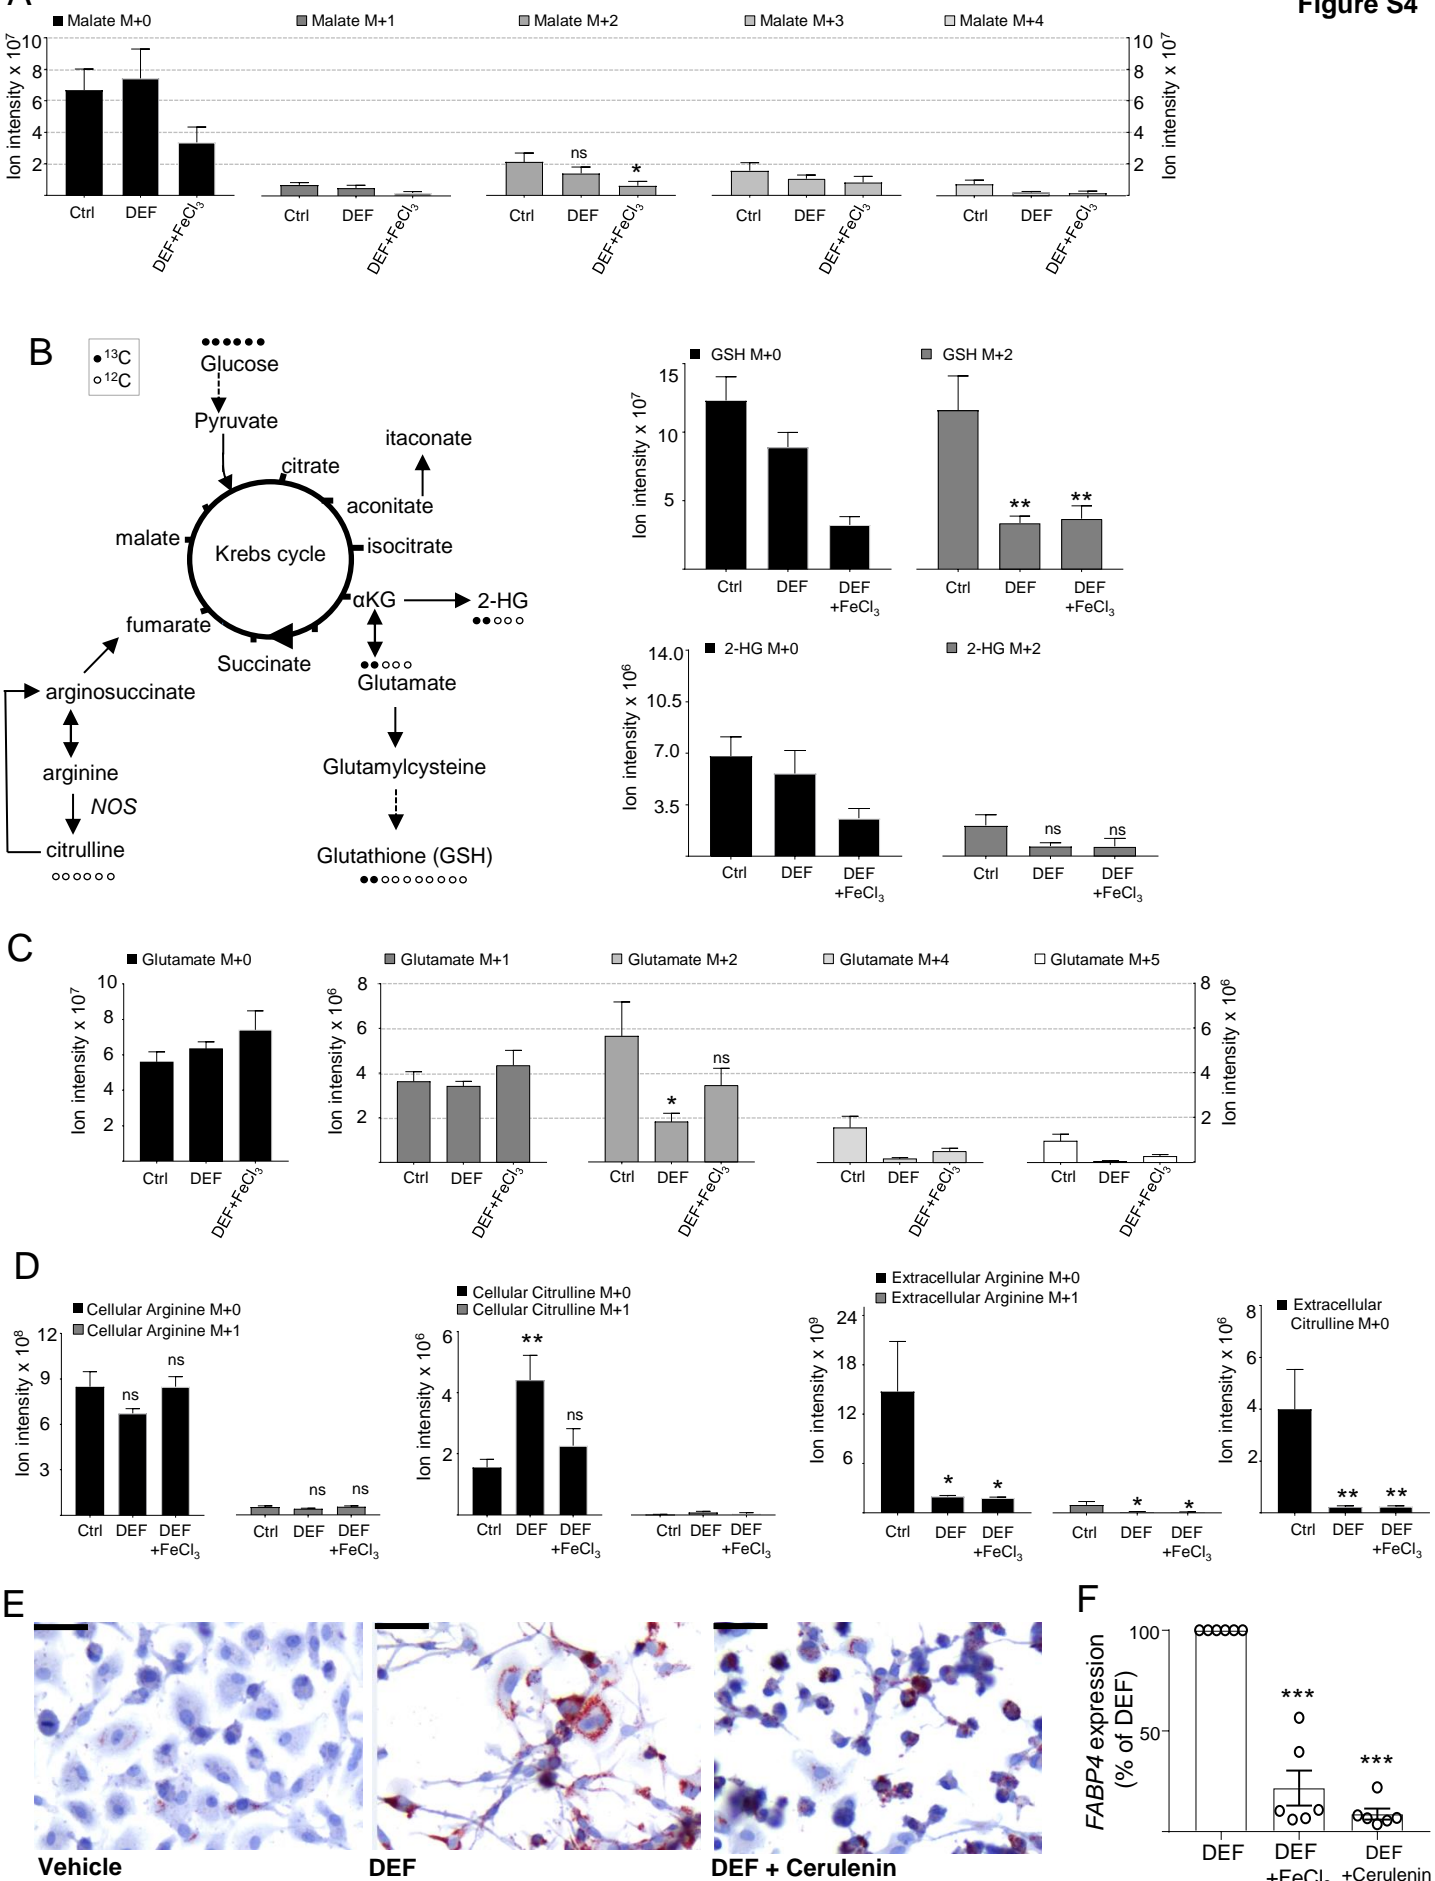

**Figure S4. Acute iron deprivation causes a brake in the TCA cycle, alters the urea cycle and induces *de novo* lipid accumulation.** Related to Figure 3. (A) Quantification of malate isotopologues by LC-MS in control (Ctrl), iron-deprived (DEF, 500 $\mu$ M), iron-rescued human macrophages with 200 $\mu$ M FeCl<sub>3</sub> supplementation (DEF+FeCl<sub>3</sub>, 8h); n=6 donors. (B) Schematic illustration of glucose- $\alpha$ KG-derived metabolites and urea cycle in uniformly labelled [U]-<sup>13</sup>C- glucose catabolism (left panel) and glutathione (GSH), 2-hydroxyglutarate (2-HG) M+0 and M+2 isotopologues (right panel) in control (Ctrl), iron-deprived (DEF), iron-rescued human macrophages with FeCl<sub>3</sub> supplementation (DEF+FeCl<sub>3</sub>, 8h); n=6 donors. (C) Extracellular glutamate isotopologues quantified by LC-MS; n=6 donors. (D) Cellular (upper panel) and extracellular (lower panel) citrulline and arginine isotopologues quantified by LC-MS; n=6 donors. (E) Vehicle, DEF (500 $\mu$ M) or concomitant DEF and cerulenin (20 $\mu$ M)-treated human macrophages stained for oil-red-o. (F) *FABP4* expression (% of DEF) in hMDMs (n=2 donors). In (A), (B) and (C), only glucose-derived M+2 isotopologues were compared for significance (M+2 GSH, M+2 2-HG, M+2 glutamate). \*, P<0.05; \*\*, P<0.01 compared to Control (Ctrl) by ANOVA followed by Dunnett's multiple comparisons test. \*\*\*, P<0.001 by one sample t-test compared to 100% (DEF). ns, non-significant. Scale bars, 40 $\mu$ m. Error bars represent SEM.

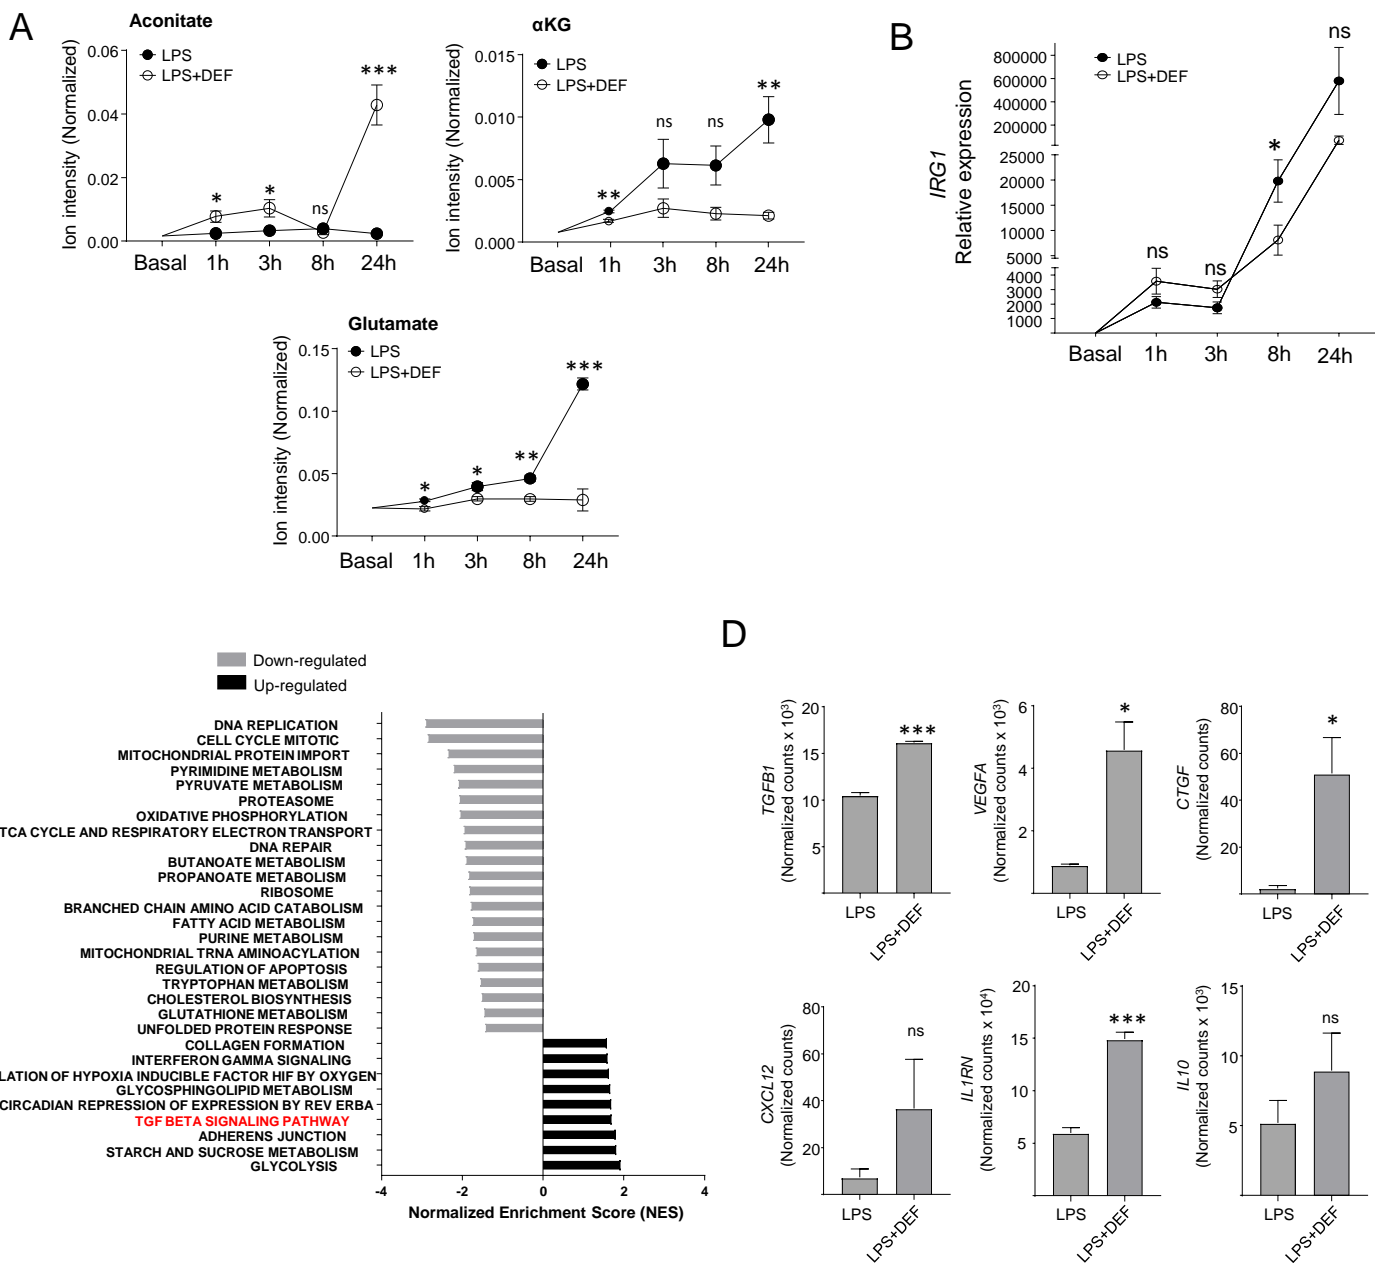

**Figure S5. Acute iron chelation limits pro-inflammatory macrophage polarization and promotes TGF- $\beta$  signalling pathway.**

Related to Figure 4. (A) LC-MS for aconitate,  $\alpha$ -ketoglutarate ( $\alpha$ KG) and glutamate in basal and LPS-treated (100ng/ml) human macrophages throughout a time course. LPS+DEF refers to macrophages pre-treated with DEF (500 $\mu$ M, 24h) prior to the LPS time-course; n=4 donors/group. (B) *IRG1* mRNA measured by qRT-PCR in basal and DEF-treated cells (500 $\mu$ M, 24h) throughout an LPS (100ng/ml) time course; n=4 donors/group. (C) Gene Set Enrichment Analysis for LPS+DEF vs. LPS comparison. (LPS, 3h, 100ng/ml; DEF, 24h, 500 $\mu$ M). TGF $\beta$  signalling pathway is shown in red. (D) *TGF $\beta$ 1*, *VEGFA*, *CTGF*, *CXCL12*, *IL1RN*, *IL10* expression measured by RNA-seq (normalized counts) in LPS and LPS+DEF stimulated human macrophages; n=3 donors/group.

\*, P<0.05; \*\*, P<0.01; \*\*\*, P<0.001 by t-test; ns, non-significant. Error bars represent SEM.

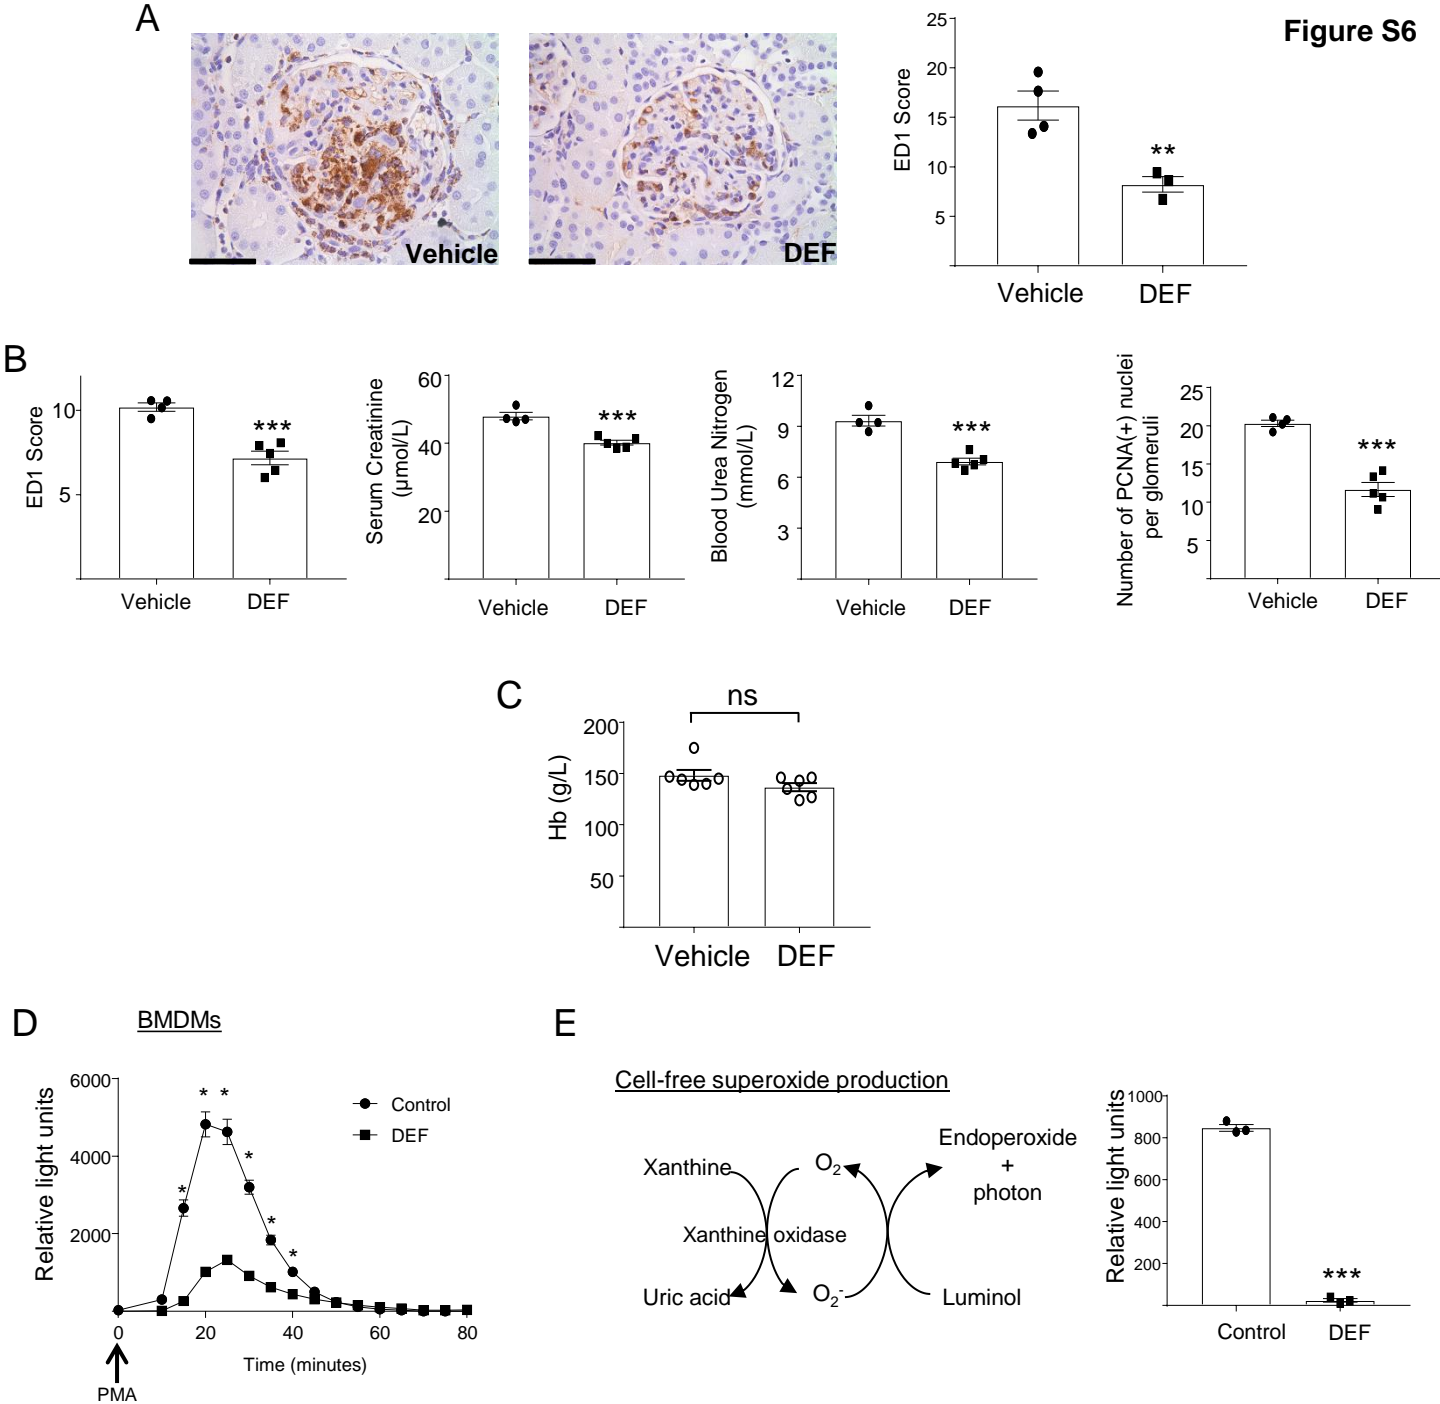

**Figure S6. Acute iron chelation decreases the severity of glomerulonephritis and reduces superoxide production in macrophages.** Related to Figure 6. (A) ED1 staining showing macrophages in the glomeruli; ED1 score (right panel) was normalized to glomerular size; at least  $n=3$  rats/group; preventive NTN experiment. (B) ED1 score, serum creatinine, blood urea nitrogen, glomerular PCNA+ nuclei; at least  $n=4$  rats/group; therapeutic NTN experiment. (C) Serum haemoglobin (Hb) counts;  $n=6$  rats/group. (D) Superoxide chemiluminescence signal in WKY BMDMs stimulated with  $1 \mu\text{M}$  phorbol myristate acetate (PMA) with or without of deferiprone (DEF,  $500 \mu\text{M}$ ); at least 3 rats/group. (E) Superoxide chemiluminescence signal produced by xanthine-xanthine oxidase reaction in a cell free setup (left panel) with or without deferiprone (DEF,  $500 \mu\text{M}$ , right panel). \*,  $P<0.05$ ; \*\*,  $P<0.01$ ; \*\*\*,  $P<0.001$  by t-test. ns, non-significant. Scale bars,  $40\mu$ . Error bars represent SEM.



|                                        | <i>Patient 1</i> | <i>Patient 2</i> | <i>Patient 3</i> | <b>Normal Ranges</b> |
|----------------------------------------|------------------|------------------|------------------|----------------------|
| <b>Age</b>                             | 77               | 83               | 51               |                      |
| <b>Gender</b>                          | F                | M                | M                |                      |
| <b>Cause of CKD</b>                    | Diabetes         | Diabetes         | Diabetes         |                      |
| <b>Creatinine (µmol/L)</b>             | 272              | 302              | 456              | 60-125               |
| <b>eGFR (ml/min/1.73m<sup>2</sup>)</b> | 16.2             | 18.5             | 13.9             | >90                  |
| <b>CKD Stage</b>                       | IV               | IV               | V                |                      |
| <b>Hb (g/dL)</b>                       | 10.2             | 9.6              | 10.3             | 13-16.5              |
| <b>Ferritin (µg/L)</b>                 | 281              | 30               | 106              | 20-300               |
| <b>Iron (µmol/L)</b>                   | 9                | N/A              | 11               | 12-31                |
| <b>Transferrin Saturation (%)</b>      | 20               | N/A              | 24               | 16-55                |
| <b>Transferrin (g/L)</b>               | 1.8              | N/A              | 1.8              | 1.7-3.4              |
| <b>MCV (fL)</b>                        | 98.7             | 87.2             | 89               | 83.5-99.5            |
| <b>CRP (mg/L)</b>                      | 3                | 19.1             | 0.9              | 0-5                  |
| <b>ESA</b>                             | Aranesp          | No               | No               |                      |

**Table S1. Clinical characteristics of chronic kidney disease (CKD) patients undergoing intravenous iron administration.** Related to Figure 1. eGFR, estimated glomerular filtration rate; Hb, haemoglobin; MCV, mean corpuscular volume; CRP, c-reactive protein; ESA, erythropoiesis stimulating agent.

| Gene name / siRNA name             | Sequence                                                                                 |
|------------------------------------|------------------------------------------------------------------------------------------|
| <i>PLOD2</i> -F                    | GGGAATGGACTTTTGCCGTC                                                                     |
| <i>PLOD2</i> -R                    | CCACAGCTTTCCATGACGAG                                                                     |
| <i>P4HA1</i> -F                    | TTTGACGAAAGATGAGCC                                                                       |
| <i>P4HA1</i> -R                    | TCCTTCTCCACTGGCAAACA                                                                     |
| <i>LDHA</i> -F                     | GTGGAGGTTGTGCATGTTGT                                                                     |
| <i>LDHA</i> -R                     | CGTCAGAGGTGGCAGAACTA                                                                     |
| <i>HK2</i> -F                      | GCCATCCTGCAACACTTAGG                                                                     |
| <i>HK2</i> -R                      | CCACACCCACTGTCACTTTG                                                                     |
| <i>STEAP1</i> -F                   | TGCCTGGATTGAGCATGATG                                                                     |
| <i>STEAP1</i> -R                   | AATGCGTGATTGTGCCAG                                                                       |
| <i>CDC20</i> -F                    | ACCATGATGTTCCGGTAGCA                                                                     |
| <i>CDC20</i> -R                    | AATGTCTGCAGAGGAACCCA                                                                     |
| <i>DDX21</i> -F                    | AACTTCAAGTGGGCAAGCTG                                                                     |
| <i>DDX21</i> -R                    | CAGGGGCTACATCAGGTTCT                                                                     |
| <i>EGLN3</i> -F                    | CCTCACTGAAGACTGACCGT                                                                     |
| <i>EGLN3</i> -R                    | ACCACACACAAGACAGGGAT                                                                     |
| <i>ENO2</i> -F                     | CCCGACACCTGTATTGCATG                                                                     |
| <i>ENO2</i> -R                     | TGGGAGCCAAGAAGAGGATG                                                                     |
| <i>SDHB</i> -F                     | CACAGCTCCCCGTATCAAGA                                                                     |
| <i>SDHB</i> -R                     | CAAGAGCCACAGATGCCTTC                                                                     |
| <i>NDUFS6</i> -F                   | TCGGTTTGTAGGTCGTCAGA                                                                     |
| <i>NDUFS6</i> -R                   | CTAGTGGTGGTGCTGTCTGA                                                                     |
| <i>CHAC1</i> -F                    | GACTTCATGCAGCTCTGTGG                                                                     |
| <i>CHAC1</i> -R                    | TCTGTCTTGTGCACTGGAGT                                                                     |
| <i>TRIB3</i> -F                    | AGCTCACTCTGGAACTGTG                                                                      |
| <i>TRIB3</i> -R                    | ATCCTGTCCCTCAACCTTGG                                                                     |
| <i>ATF5</i> -F                     | GGACCGCAAGCAAAGAAGA                                                                      |
| <i>ATF5</i> -R                     | CTCGATGAGCAGGTCCTTGA                                                                     |
| <i>SHMT2</i> -F                    | CTGACTGCTCGACTTTTCCG                                                                     |
| <i>SHMT2</i> -R                    | GTGAGTAGTGGTGGTGACGA                                                                     |
| <i>ISCU</i> -F                     | ATCCTAGAAACGTGGGGTCC                                                                     |
| <i>ISCU</i> -R                     | CTTCTCCACCGTCTTTCTT                                                                      |
| <i>IFIT2</i> -F                    | GCGAAACAACGCTCCATCT                                                                      |
| <i>IFIT2</i> -R                    | CCAAGACATGCAAAGCCTCA                                                                     |
| <i>OAS2</i> -F                     | GCTTCCAACCTATCCACGTC                                                                     |
| <i>OAS2</i> -R                     | GGCAGGCTCAGAAGGAAAAG                                                                     |
| <i>OAS3</i> -F                     | TGCCATATTGACAGCCTCCA                                                                     |
| <i>OAS3</i> -R                     | GGATATGTGTGTGGCAGCAG                                                                     |
| <i>IRG1</i> -F                     | TGTGTGGACTTCATGAGCCT                                                                     |
| <i>IRG1</i> -R                     | TTAAACCCACCCATTCCCCA                                                                     |
| <i>FABP4</i> -F                    | AAACTGGTGGTGAATGCGT                                                                      |
| <i>FABP4</i> -R                    | GCGAACTTCAGTCCAGGTCA                                                                     |
| <b>SMARTpool siRNA <i>ISCU</i></b> | GAGCUAUGAGAUACGCACA<br>CAGCAUGUGGUGACGUAAU<br>CAUAAAACAGAUUGCGCAU<br>GGUCUGAAUUAUUGAUAGA |

**Table S2. Primer sequences used in the study.** Related to STAR Methods. Gene names are followed by -F (Forward) and -R (Reverse). Individual siRNA target sequences are shown for the SMARTpool.
